# Supplementary material
Source: PubMed Central journal article supplement (PMC6214732)
Supplement: NIHMS1503904-supplement-2.pdf [file NIHMS1503904-supplement-2.pdf]

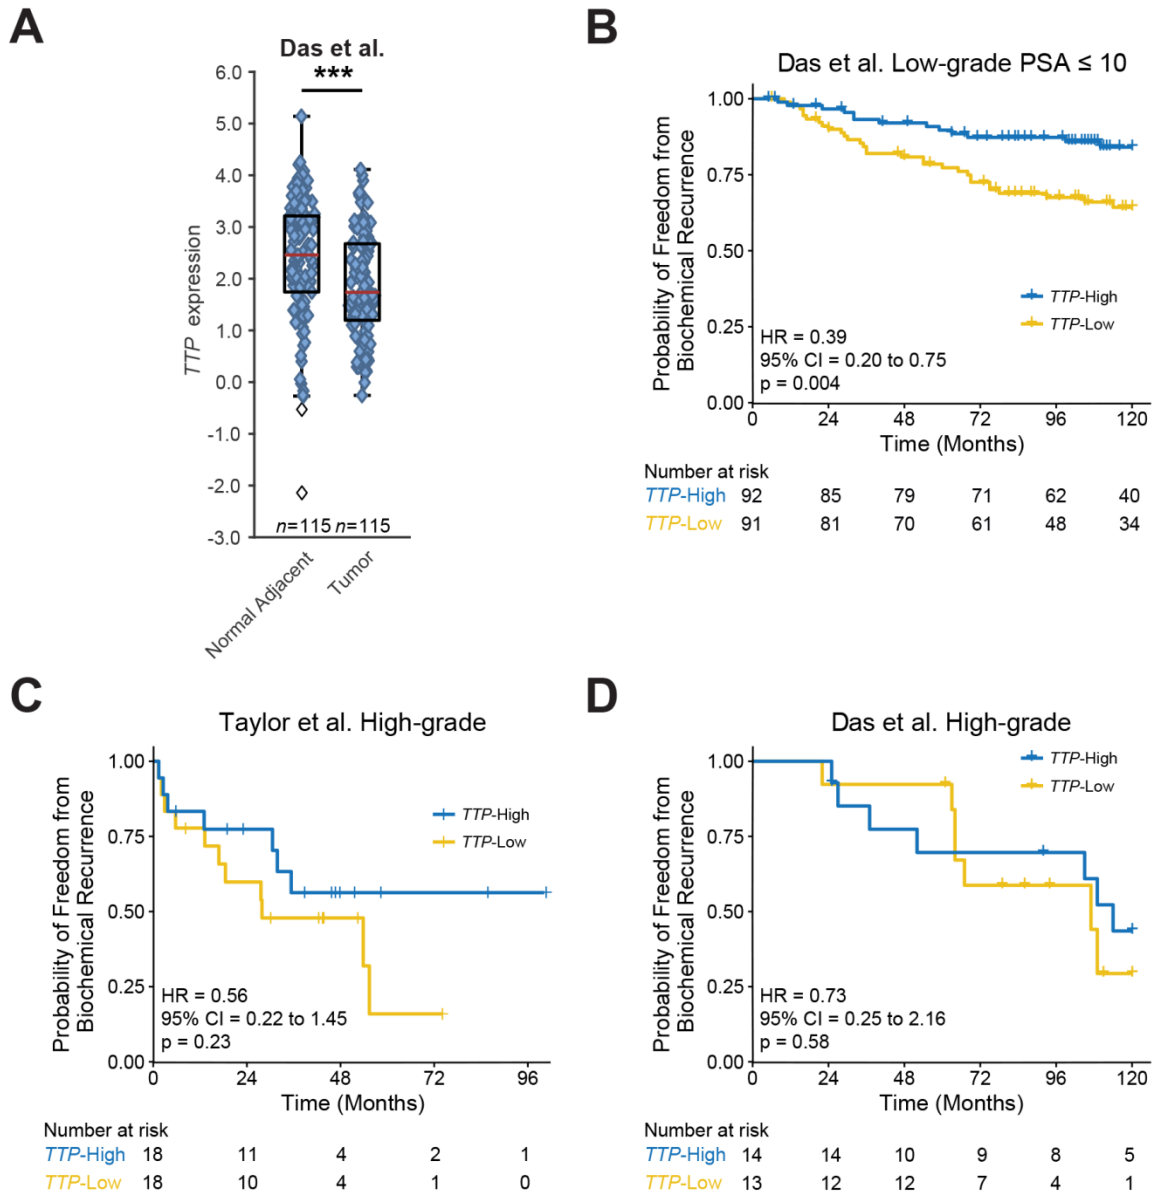

### Supplementary Figure S1.

**A**, Das et al. cohort showing *TTP* mRNA levels at prostatectomy in patient-matched normal adjacent tissues versus primary prostate tumor tissues (\*\* $p < .001$ , paired t-test). **B**, Kaplan-Meier curve showing the time to BCR in low-grade primary prostate cancer patients with PSA  $\leq$  10 ng/ml from the Das et al. cohort separated into *TTP*-High and *TTP*-Low subtypes based on the median *TTP* RNA level ( $p$ -value, Mantel-Cox log-rank test). **C** and **D**, Kaplan-Meier curves showing the time to BCR in primary prostate cancer patients separated into *TTP*-High and *TTP*-Low subtypes based on median *TTP* RNA levels for pathologically high-grade patients from the Taylor et al. cohort (**C**) and the Das et al. cohort (**D**) ( $p$ -values, Mantel-Cox log-rank test).
